# Supplementary material
Source: PubMed Central journal article supplement (PMC11574872)
Supplement: NIHMS1670433-supplement-1.pdf [file NIHMS1670433-supplement-1.pdf]

## Supplementary information:

### High-throughput Density Functional Perturbation Theory and Machine Learning Predictions of Infrared, Piezoelectric and Dielectric Responses

Kamal Choudhary<sup>1</sup>, Kevin F. Garrity<sup>1</sup>, Vinit Sharma<sup>2,3</sup>, Adam Biacchi<sup>4</sup>, Angela R. Hight Walker<sup>4</sup>, Francesca Tavazza<sup>1</sup>

1 Materials Science and Engineering Division, National Institute of Standards and Technology, Gaithersburg, Maryland 20899, USA.

2 National Institute for Computational Sciences, Oak Ridge National Laboratory, Oak Ridge, TN 37831, USA.

3 Joint Institute for Computational Sciences, University of Tennessee, Knoxville, TN, 37996, USA.

4 Engineering Physics Division, National Institute of Standards and Technology, Gaithersburg, Maryland 20899, USA.

Table S1 Comparison of experimental and DFPT IR frequencies (cm<sup>-1</sup>).

| <b>Mats.</b>  | <b>JID</b> | <b>DFPT</b>                       | <b>Experiment</b>                  |
|---------------|------------|-----------------------------------|------------------------------------|
| <b>ZnO</b>    | 1195       | 379, 410                          | 389,413 <sup>1</sup>               |
| <b>AlN</b>    | 39         | 600, 653                          | 620,669 <sup>2</sup>               |
| <b>GaN</b>    | 30         | 532                               | 531 <sup>3,4</sup>                 |
| <b>SnS</b>    | 1109       | 93, 144, 178, 214                 | 99, 145, 178, 220 <sup>5</sup>     |
| <b>SnSe</b>   | 299        | 72.6, 98.44, 125.01, 160.3        | 80,96,123, 150 <sup>5</sup>        |
| <b>KMgF3</b>  | 20882      | 160.0, 287.0, 470.8               | 168, 299, 458 <sup>6</sup>         |
| <b>LiNbO3</b> | 1240       | 145.0, 216.6                      | 160, 220 <sup>7</sup>              |
| <b>GeS</b>    | 2169       | 106.4, 196.2, 236.5, 253.0, 276.9 | 118, 201,238,258, 280 <sup>8</sup> |
| <b>MAD</b>    |            |                                   | 8.36                               |

Table S2 Comparison of piezoelectric coefficient  $\max(e_{ij})$  data for experiments and DFT. We take average values for the cases where the experimental data are in a range.

| <b>Mats.</b>             | <b>JID</b> | <b>Max(<math>e_{ij}</math>)</b> | <b>DFT</b> | <b>Reference</b> |
|--------------------------|------------|---------------------------------|------------|------------------|
| <b>BN</b>                | 57695      | 1.55                            | 1.15       | 9                |
| <b>AlN</b>               | 39         | 1.39-1.55                       | 1.39       | 10-12            |
| <b>ZnS</b>               | 7648       | 0.38                            | 0.13       | 9                |
| <b>ZnSe</b>              | 8047       | 0.35                            | 0.06       | 9                |
| <b>SiO<sub>2</sub></b>   | 41         | 0.171                           | 0.16       | 13,14            |
| <b>BaTiO<sub>3</sub></b> | 110        | 1.94-5.48                       | 4.13       | 15,16 17,18      |
| <b>LiNbO<sub>3</sub></b> | 1240       | 1.33                            | 1.59       | 19               |
| <b>GaSb</b>              | 35711      | -0.07                           | -0.102     | 9                |
| <b>PbTiO<sub>3</sub></b> | 3450       | 3.35-5.0                        | 3.96       | 20               |
| <b>GaN</b>               | 30         | 0.73                            | 0.47       | 21               |
| <b>InN</b>               | 1180       | 0.97                            | 0.90       | 22               |
| <b>AlP</b>               | 1327       | -0.1                            | 0.004      | 9                |
| <b>AlAs</b>              | 1372       | -0.16                           | 0          | 9                |
| <b>AlSb</b>              | 1408       | -0.13                           | 0.06       | 9                |
| <b>ZnO</b>               | 1195       | 1.00-1.55,0.89                  | 1.10       | 23               |
| <b>BeO</b>               | 20778      | 0.1                             | 0.22       | 23               |
| <b>MAD</b>               |            |                                 | 0.21       |                  |

Table. S3 Comparison of static dielectric constant for DFPT, MBJ and experiment. Experimental data were obtained from <sup>24-28</sup>. MBJ data were obtained from our optoelectronic property database<sup>29</sup>.

| <b>Materials</b>         | <b>JID</b> | <b>DFPT</b>           | <b>MBJ</b>            | <b>Experiment</b>     |
|--------------------------|------------|-----------------------|-----------------------|-----------------------|
| <b>MoS<sub>2</sub></b>   | 54         | $\epsilon_{11}=15.56$ | $\epsilon_{11}=15.34$ | $\epsilon_{11}=17.0$  |
| <b>MoSe<sub>2</sub></b>  | 57         | $\epsilon_{11}=16.90$ | $\epsilon_{11}=16.53$ | $\epsilon_{11}=18.0$  |
| <b>MoTe<sub>2</sub></b>  | 60         | $\epsilon_{11}=21.72$ | $\epsilon_{11}=18.74$ | $\epsilon_{11}=20.0$  |
| <b>WS<sub>2</sub></b>    | 72         | $\epsilon_{11}=13.91$ | $\epsilon_{11}=13.95$ | $\epsilon_{11}=11.5$  |
| <b>WSe<sub>2</sub></b>   | 75         | $\epsilon_{11}=15.21$ | $\epsilon_{11}=14.32$ | $\epsilon_{11}=11.7$  |
| <b>SiC</b>               | 182        | 7.10                  | 6.01                  | 6.552                 |
| <b>AlP</b>               | 1327       | 10.33                 | 6.94                  | 7.54                  |
| <b>BN</b>                | 17         | $\epsilon_{11}=4.75$  | $\epsilon_{11}=3.72$  | $\epsilon_{11}=5.06$  |
| <b>BP</b>                | 1312       | 9.03                  | 7.94                  | 11.0                  |
| <b>GaP</b>               | 1393       | 13.22                 | 8.33                  | 11.11                 |
| <b>AlSb</b>              | 1408       | 12.27                 | 9.87                  | 12.04                 |
| <b>ZnS</b>               | 1702       | 9.39                  | 4.8                   | 8.0                   |
| <b>CdTe</b>              | 23         | 19.59                 | 6.54                  | 10.6                  |
| <b>HgTe</b>              | 8041       | $\epsilon_{11}=29.44$ | $\epsilon_{11}=11.22$ | $\epsilon_{11}=20$    |
| <b>ZnSiP<sub>2</sub></b> | 2376       | $\epsilon_{11}=12.44$ | $\epsilon_{11}=8.56$  | $\epsilon_{11}=11.15$ |
| <b>ZnGeP<sub>2</sub></b> | 2355       | $\epsilon_{11}=14.75$ | $\epsilon_{11}=9.02$  | $\epsilon_{11}=15$    |
| <b>MAE</b>               | -          | 2.46                  | 2.78                  | -                     |

Table S4 K-point dependence of average dielectric constant, maximum piezoelectric coefficient, maximum and minimum optical phonon modes for Si (JVASP-1002), AlN (JVASP-39), MgF<sub>2</sub> (JVASP-20134). Equivalent K-points are represented in length (Å unit), mesh and per atom units.

| Materials        | KP-length(Å) | KP-mesh  | KP-per atom | $\epsilon_{\text{avg}}$ | Max(eij) | Max mode (cm <sup>-1</sup> ) | Min mode (cm <sup>-1</sup> ) |
|------------------|--------------|----------|-------------|-------------------------|----------|------------------------------|------------------------------|
| Si               | 35           | 6x6x6    | 1728        | 12.9                    | 0.0      | 496.5                        | 153.3                        |
| Si               | 50           | 9X9X9    | 5832        | 12.8                    | 0.0      | 496.4                        | 153.0                        |
| Si               | 65           | 12x12x12 | 13824       | 12.8                    | 0.0      | 496.3                        | 153.1                        |
| AlN              | 25           | 9x9x5    | 1620        | 8.6                     | 1.39     | 713.9                        | 240.8                        |
| AlN              | 40           | 15x15x8  | 7200        | 8.6                     | 1.39     | 714.0                        | 240.8                        |
| AlN              | 55           | 20x20x11 | 17600       | 8.6                     | 1.40     | 713.9                        | 240.8                        |
| MgF <sub>2</sub> | 20           | 4x4x7    | 672         | 5.26                    | 0.0      | 507.0                        | 86.1                         |
| MgF <sub>2</sub> | 35           | 8x8x11   | 4224        | 5.26                    | 0.0      | 507.0                        | 86.2                         |
| MgF <sub>2</sub> | 50           | 11x11x16 | 11616       | 5.26                    | 0.0      | 506.9                        | 86.2                         |

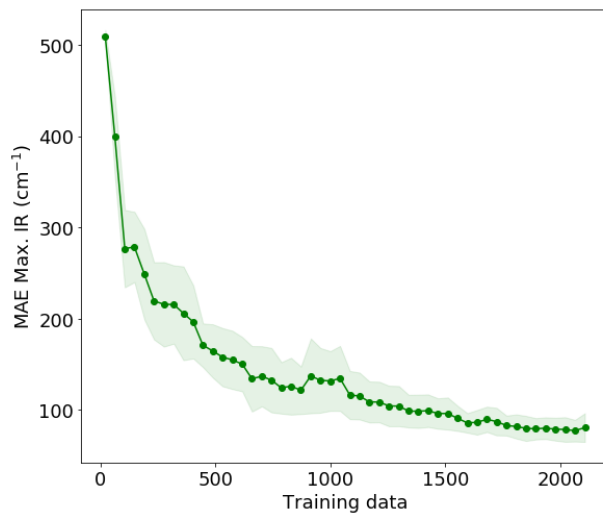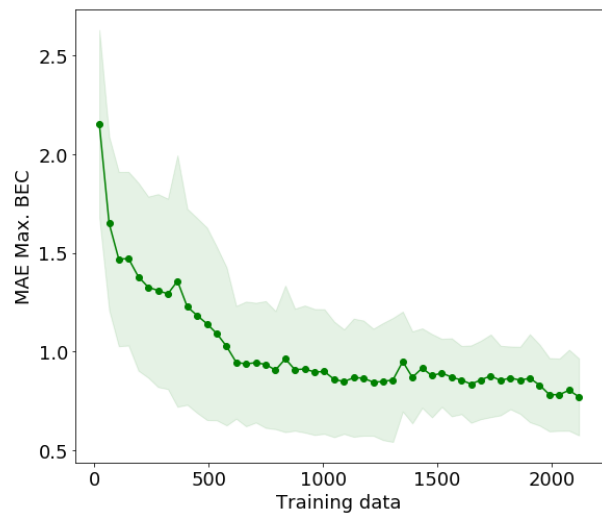

Fig S1 Regression learning curves for maximum IR mode and Born effective charge. The filled regions show standard deviation as we carry out five-fold cross-validation for each training data points in the figures.
